# Supplementary material for: Behavioral Disassociation of Perceived Sweet Taste Intensity and Hedonically Positive Palatability
Source: eNeuro. 2020 Oct 27;7(5):ENEURO.0268-20.2020. doi: 10.1523/ENEURO.0268-20.2020 (PMC7598907; doi:10.1523/ENEURO.0268-20.2020)
Supplement: Extended Data Table 1-1 — Statistical table. Download Table 1-1, XLSX file. [file enu-eN-NWR-0268-20-s01.xlsx]

## Sheet: Sheet1
Figure		Test	Variables	Statistic-value	p-value	Post hoc test	Post hoc	p-value
Table 1. Behavioral changes in sucrose discrimination and generalization task Pre vs. Post CTA	Peformance	Student's t	Saline Performance Pre vs. Post CTA	t(16) = 0.88	n.s.
	CDL	Peformance	Saline CDL Pre vs. Post CTA	t(16) = 0.95	n.s.
	Response time	Student's t	Saline Response movement time Pre vs. Post CTA	t(16) = 2.04	n.s.
	Return time	Student's t	Saline Return movement time Pre vs. Post CTA	t(16) = 0.27	n.s.
	Number of trials	Student's t	Saline Number of trials Pre vs. Post CTA	t(16) = 0.20	n.s.
	PSE	Student's t	Saline PSE Pre vs. Post CTA	t(19) = 2.85	p < 0.05
	Limen	Student's t	Saline Limen Pre vs. Post CTA	t(15) = 1.42	n.s.
	WF	Student's t	Saline WF Pre vs. Post CTA	t(15) = 0.91	n.s.
	Peformance	Student's t	LiCl Performance Pre vs. Post CTA	t(23) = 2.72	p < 0.05
	CDL	Student's t	LiCl CDL Pre vs. Post CTA	t(23) = 1.31	n.s.
	Response time	Student's t	LiCl Response movement time Pre vs. Post CTA	t(23) = 0.98	n.s.
	Return time	Student's t	LiCl Return movement time Pre vs. Post CTA	t(23) = 0.37	n.s.
	Number of trials	Student's t	LiCl Number of trials Pre vs. Post CTA	t(23) = 0.14	n.s.
	PSE	Student's t	LiCl PSE Pre vs. Post CTA	t(17) = 0.68	n.s.
	Limen	Student's t	LiCl Limen Pre vs. Post CTA	t(15) = 0.85	n.s.
	WF	Student's t	LiCl WF Pre vs. Post CTA	t(15) = 0.45	n.s.
Fig. 2. Discrimination and Generalization Pre-CTA	Performance	Mixed-effects model	Performance across days	F(29, 129) = 47.46	p < 0.0001
	Outcome Licks	Mixed-effects model	Sessions	F(40, 606) = 3.85	p < 0.0001
			Trial-type(Rewarded vs. Unrewarded)	F(1, 16) = 394.9	p < 0.0001
			Session x Trial-type	F(40, 606) = 0.84	n.s.
	Generalization	One-way ANOVA	High-sucrose responses	F(7, 64) = 78.16	p < 0.0001	Dunnett's multiple comparison	3-D vs. 18-D	p < 0.0001
							3-D vs. 0%	n.s.
							3-D vs. 3%	n.s.
							3-D vs. 4.75%	n.s.
							3-D vs. 7.5%	p < 0.0001
							3-D vs. 11.75%	p < 0.0001
							3-D vs. 18%	p < 0.0001
Fig. 3. CTA. Pre vs.Post CTA	CTA	Mann Whitney's U	Baseline (Saline vs. LiCl)	U = 8	n.s.
			CTA (Saline vs. LiCl)	U = 7	n.s.
			Recovery1 (Saline vs. LiCl)	U = 5	n.s.
			Test1 + CTA (Saline vs. LiCl)	U = 0	p < 0.02
			Recovery2 (Saline vs. LiCl)	U = 5	n.s.
			Test2 (Saline vs. LiCl)	U = 0	p < 0.01
	Pre. vs Post Generalization	two-way ANOVA	Saline (Pre vs. Post CTA)	F(1, 30) = 0.16	n.s.
			Saline (Concentrations)	F(7, 30) = 82.46	p < 0.0001
			Saline (Interaction (Pre vs. Post x Concentration))	F(7, 30) = 1.13	n.s.
			LiCl (Pre vs. Post CTA)	F(1, 40) = 0.65	n.s.
			LiCl (Concentrations)	F(7, 40) = 138.1	p < 0.0001
			LiCl (Interaction (Pre vs. Post x Concentration))	F(7, 40) = 1.82	n.s.
Fig. 4. Two bottle test	Preference Ratio	Wilcoxon	Saline (Day 1 vs. day 2)	W = 10	n.s.
			LiCl (Day 1 vs. day 2)	W = 9	n.s.
		Mann Whitney U	Saline vs. LiCl Day 1	U = 0 30	p <= 0.02
			Saline vs. LiCl Day 2	U = 0 30	p <= 0.02
Extended Data Fig. 1-1. Discrimination Pre-CTA	Cue Dependent Licks	Mixed-effects model	Sessions	F(40, 606) = 6.87	p < 0.0001
			Concentrations	F(1, 16) = 0.02	n.s.
			Session x Concentration	F(40, 606) = 0.66	n.s.
	Response Movement		Sessions	F(40, 606) = 8.21	p < 0.0001
			Concentrations	F(1, 16) = 0.03	n.s.
			Session x Concentration	F(40, 606) = 0.52	n.s.
	Return Movement		Sessions	F(40, 606) = 10.78	p < 0.0001
			Concentrations	F(1, 16) = 0.74	n.s.
			Session x Concentration	F(40, 606) = 0.50	n.s.
	Outcome Licks		Sessions	F(40, 606) = 2.27	p < 0.0001
			Concentrations	F(1, 16) = 0.02	n.s.
			Session x Concentration	F(40, 606) = 0.67	n.s.
Extended Data Fig. 2-1. Pre vs. Post Discrimination	Performance	Student's t	Saline (Pre vs. Post CTA)	t(16) = 0.88	n.s.
	Cue dependent Licks		Saline (Pre vs. Post CTA)	t(16) = 0.95	n.s.
	Response Movement		Saline (Pre vs. Post CTA)	t(16) = 2.04	n.s.
	Return Movement		Saline (Pre vs. Post CTA)	t(16) = 0.27	n.s.
	Number of Trials		Saline (Pre vs. Post CTA)	t(16) = 0.20	n.s.
	Performance		LiCl (Pre vs. Post CTA)	t(23) = 2.72	p < 0.05
	Cue dependent Licks		LiCl (Pre vs. Post CTA)	t(23) = 1.31	n.s.
	Response Movement		LiCl (Pre vs. Post CTA)	t(23) = 0.98	n.s.
	Return Movement		LiCl (Pre vs. Post CTA)	t(23) = 0.37	n.s.
	Number of Trials		LiCl (Pre vs. Post CTA)	t(23) = 0.14	n.s.
